# Supplementary material
Source: PubMed Central journal article supplement (PMC3406757)
Supplement: supp_dds191_dds191supp_fig1.pdf [file supp_dds191_dds191supp_fig1.pdf]

# Supplementary Material, Figure S1: ORS/VRP Mouse Phenotyping Service Summary Report

Genetic manipulation: Male *Spg20* +/+ (A, B, C) and *Spg20* -/- (G, H, I)

## I. Body/Organ weights:

The following weights were obtained at necropsy:

|        |        |         |       |
|--------|--------|---------|-------|
| Body   | Heart  | Liver   | Brain |
| Thymus | Spleen | Kidneys |       |

The following comparisons of mutant homozygotes and wild types were made using single factor ANOVA (Microsoft Excel):

|                              |                              |
|------------------------------|------------------------------|
| Body weight                  | Heart to Brain weight ratio  |
| Brain weight                 | Liver to Brain weight ratio  |
| Spleen to Brain weight ratio | Kidney to Brain weight ratio |
| Thymus to Brain weight ratio | Brain to body weight ratio   |

**Results:** No statistically significant differences in body weight. Mouse G is 19 grams lighter than its age matched control, mouse A because of paresis and likely difficulty in feeding.

Mutant mice have smaller total kidney weight, averaging 0.87 grams on average than wild type, averaging 0.95 grams. However  $P=0.07$  and the significance is uncertain.

## II. Hematology (see attached Excel file for complete data):

The following values were measured:

|            |           |                   |                   |
|------------|-----------|-------------------|-------------------|
| Hemoglobin | WBC count | Neutrophil count* | Eosinophil count* |
| Hematocrit | MCV       | Lymphocyte count* | Basophil count*   |
| RBC count  | MCHC      | Monocyte count*   | Platelet count    |
| MCH        |           |                   |                   |

\* = Absolute value

**Results:** No significant differences are present in hematological parameters. Mice B and I have high neutrophil counts. A reason is not found for mouse B. Suppurative rhinitis is the likely reason in mouse I. Mouse B also has circulating lymphocytosis.

## III. Serum Chemistries (see attached Excel file for complete data):

The following analytes were measured:

|               |                       |                  |     |
|---------------|-----------------------|------------------|-----|
| Glucose       | Calcium               | AST              | LDH |
| Cholesterol   | BUN                   | Bilirubin, total |     |
| Triglycerides | Phosphorus, inorganic | Protein, total   |     |
| Albumin       | Alkaline Phosphatase  | Uric Acid        |     |
| Amylase       | ALT                   | GGT              |     |

**Results:** Triglycerides are significantly greater in wild type mice, averaging 127.3 mg/dL vs mutant mice averaging 77.3 mg/dL. All values are within normal range.  $P=0.018$

Uric acid is significantly higher in wild type, averaging 3.9 mg/dL vs. mutant mice averaging 2.0 mg/dL.  $P=0.015$

**IV. Gross Diagnoses:** Mouse G had paresis of the right front leg and bilateral hind limbs on the day of necropsy. The subcutis is tacky. No other gross abnormalities are noted.

**V. Histopathologic diagnoses** (see attached report for full list of findings):

Unless noted in the report, the following organs were examined microscopically in all mice:

|                 |                       |                               |
|-----------------|-----------------------|-------------------------------|
| Skin            | Thyroid glands        | Kidneys                       |
| Lymph nodes     | Spleen                | Skeletal muscle               |
| Salivary glands | Liver                 | Sciatic nerve                 |
| Thymus          | Pancreas              | Brain                         |
| Trachea         | GI tract (all levels) | Spinal Cord                   |
| Esophagus       | Reproductive tract    | Femur, tibia and stifle joint |
| Lungs           | Adrenal glands        | Teeth                         |
| Heart           | Nasal sinuses         | Gall bladder                  |
| Ears            | Urinary bladder       | Bone marrow                   |
| Eyes            | Harderian glands      | Mammary glands (females)      |
| Pituitary gland | Tongue                | Parathyroid glands            |

**Histologic findings:**

The reason for paresis in mouse G is a mesenchymal neoplasm compressing the cervical spinal cord. It is composed of spindle to oval cells, compresses the spinal cord and tracks along nerve roots. It extends along the base of the brain and into the fourth ventricle. Rule outs include peripheral nerve sheath tumor, meningioma and histiocytic sarcoma.

Consistent differences between wild type and mutant mice are not found with H&E staining. Brain and spinal cord from mice A and G were also stained with luxol fast blue for myelin and cresyl violet for nerve body detail. Differences are not found aside from the tumor and results of tumor compression.

Two wild type and two mutant mice have mild to moderate centrilobular to midzonal hepatic lipidosis. Lipidosis indicates alteration in hepatocellular lipid metabolism. However, it can occur as a background lesion in certain mouse strains.

Mouse B has a cervical lymph node is enlarged with increased numbers of otherwise normal appearing lymphocytes. Invasion of the capsule or other tissues is not present precluding a diagnosis of lymphoma. This may be related to the circulating lymphocytosis in this animal.

Mouse I has suppurative rhinitis. Other incidental findings include ceroid-laden macrophages in adrenal glands, preputial gland inflammation, medial hypertrophy of pulmonary arteries, perivascular lymphoid infiltrates in various tissues, degenerative joint disease and pancreatic islet cell neoplasia.

**VI. Conclusions:**

Triglycerides may be greater in wild type compared to mutant mice. This may be related to genotype if the gene in question has effects on lipid metabolism. Kidney weights may also be genotype related. Uric acid may also be genotype related. The neoplasm may be genotype related. Other findings are unlikely to be genotype related.

Differences in myelination or other structures of the nervous system are not seen. A caveat is that only two mice from each age group are compared and the total sample size is small.
