# Supplementary material
Source: PubMed Central journal article supplement (PMC3406757)
Supplement: supp_dds191_dds191supp_table1.pdf [file supp_dds191_dds191supp_table1.pdf]

**Supplementary Material, Table S1.** Organ weights and serum chemistries in male *Spg20+/+* and *Spg20-/-* mice

| Variable                     | <i>Spg20+/+</i> | <i>Spg20-/-</i> |
|------------------------------|-----------------|-----------------|
| Age (days)                   | 209.00          | 194.00          |
| Body weight                  | 45.01           | 37.25           |
| Thymus weight                | 0.07            | 0.07            |
| Liver weight                 | 2.34            | 1.84            |
| Spleen weight                | 0.07            | 0.09            |
| Brain weight                 | 0.48            | 0.46            |
| Albumin, g/dL                | 3.17            | 3.00            |
| Alkaline phosphatase, U/L    | 56.67           | 50.33           |
| ALT, U/L                     | 73.33           | 47.33           |
| Amylase, U/L                 | 1310.67         | 1481.67         |
| AST, U/L                     | 202.00          | 100.67          |
| BUN, mg/dL                   | 33.33           | 26.67           |
| Calcium, mg/dL               | 10.97           | 10.13           |
| Cholesterol, mg/dL           | 103.00          | 104.00          |
| GGT, U/L                     | 1.67            | 2.67            |
| Glucose, mg/dL               | 285.67          | 302.33          |
| LDH, U/L                     | 532.33          | 244.33          |
| Phosphorus, inorganic, mg/dL | 7.33            | 7.03            |
| Bilirubin, total, mg/dL      | 0.50            | 0.27            |
| Protein, total, g/dL         | 5.70            | 5.43            |
| Triglycerides, mg/dL *       | 127.33          | 77.33           |
| Uric acid, mg/dL *           | 3.87            | 1.97            |

Values shown are means, with  $n=3$  for each condition.
